# Supplementary material for: Catalytic Reductive Amination of Aromatic Aldehydes on Co-Containing Composites
Source: MDPI journal article supplement (doi:10.3390/chemistry5010022), 2023-02-17
Supplement: s1 [file chemistry-2168585-supplementary.pdf › chemistry-2168585-supplementary.pdf]

# Supplementary Materials

## Catalytic reductive amination of aromatic aldehydes on Co-containing composites

Vladyslav V. Subotin <sup>1,2</sup>, Vitalii M. Asaula <sup>2</sup>, Yulian L. Lishchenko <sup>1,2</sup>, Mykyta O. Ivanytsya <sup>1,2</sup>, Olena O. Pariiska <sup>2</sup>, Sergey V. Ryabukhin <sup>1,3,4</sup>, Dmitriy M. Volochnyuk <sup>1,3,4</sup> and Sergey V. Kolotilov <sup>2,3,\*</sup>

<sup>1</sup> Enamine Ltd., Chervonotkatska Street 78, 02094 Kyiv, Ukraine

<sup>2</sup> L.V. Pisarzhevskii Institute of Physical Chemistry of the National Academy of Sciences of Ukraine, prosp. 7 Nauky 31, 03028 Kyiv, Ukraine

<sup>3</sup> Institute of High Technologies, Taras Shevchenko National University of Kyiv, Volodymyrska Street 60, 01601 Kyiv, Ukraine

<sup>4</sup> Institute of Organic Chemistry, National Academy of Sciences of Ukraine, Murmanska Street 5, 02660 Kyiv, Ukraine

\* Correspondence: s.v.kolotilov@gmail.com

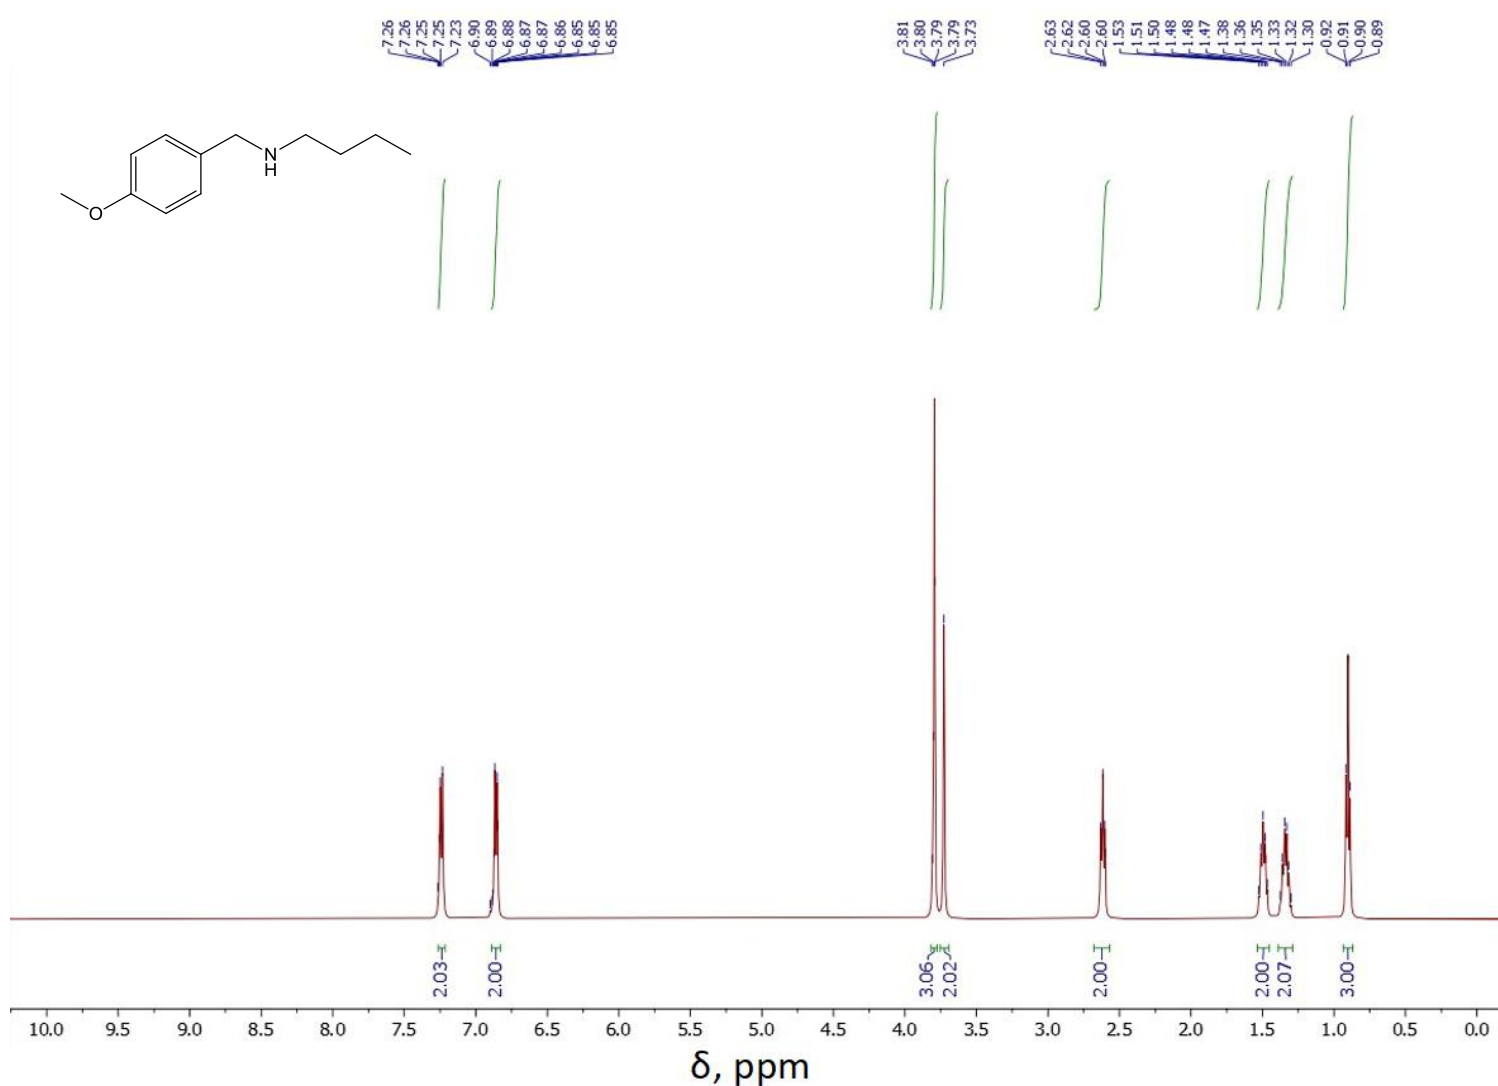

Figure S1. <sup>1</sup>H NMR of *N*-*n*-butyl-*N*-*p*-methoxybenzylamine (400 MHz, CDCl<sub>3</sub>).

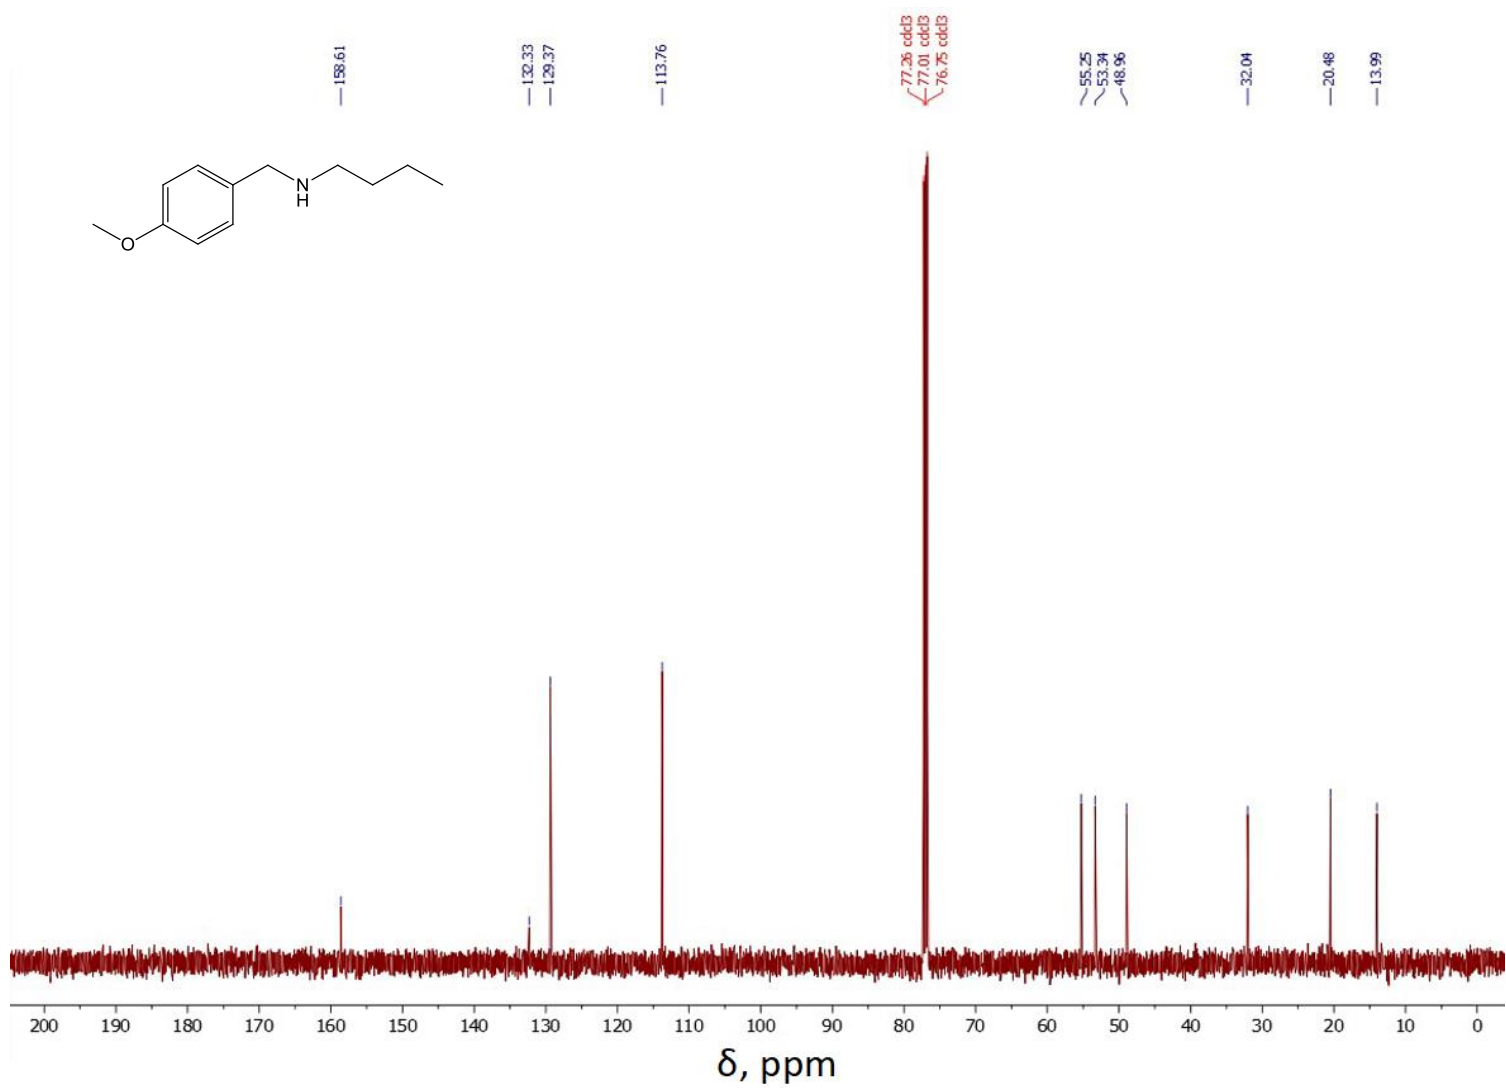

**Figure S2.** <sup>13</sup>C NMR of *N*-*n*-butyl-*N*-*p*-methoxybenzylamine (126 MHz, CDCl<sub>3</sub>)

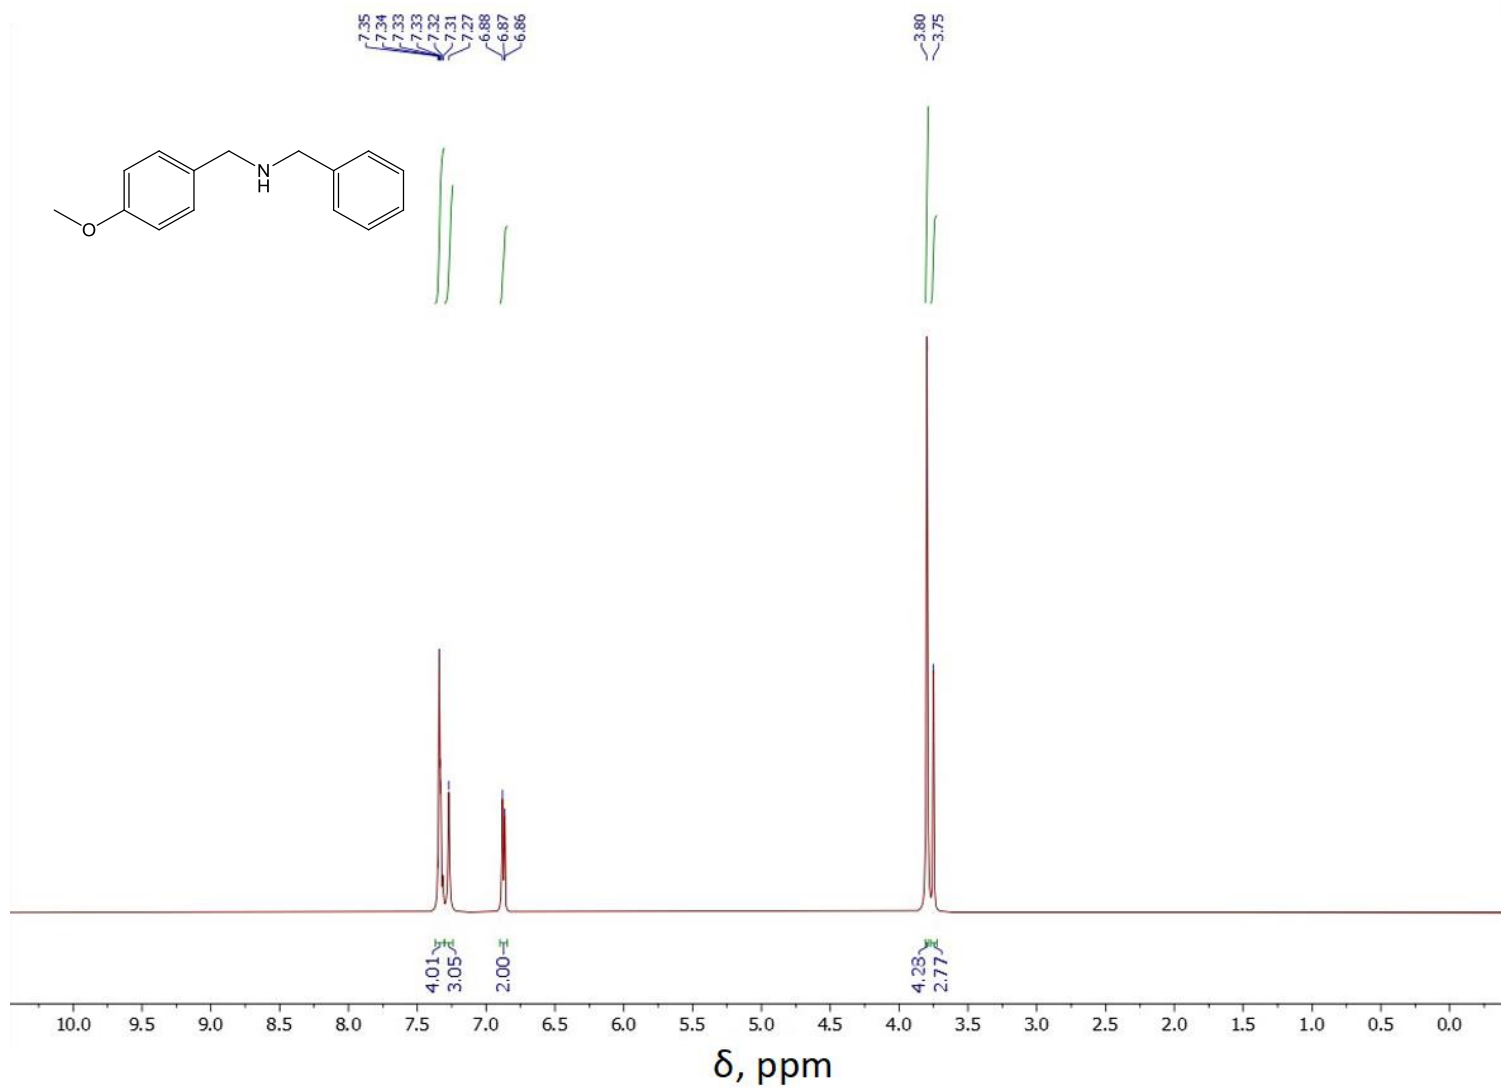

**Figure S3.** <sup>1</sup>H NMR of *N*-benzyl-*N*-*p*-methoxybenzylamine (400 MHz, CDCl<sub>3</sub>)

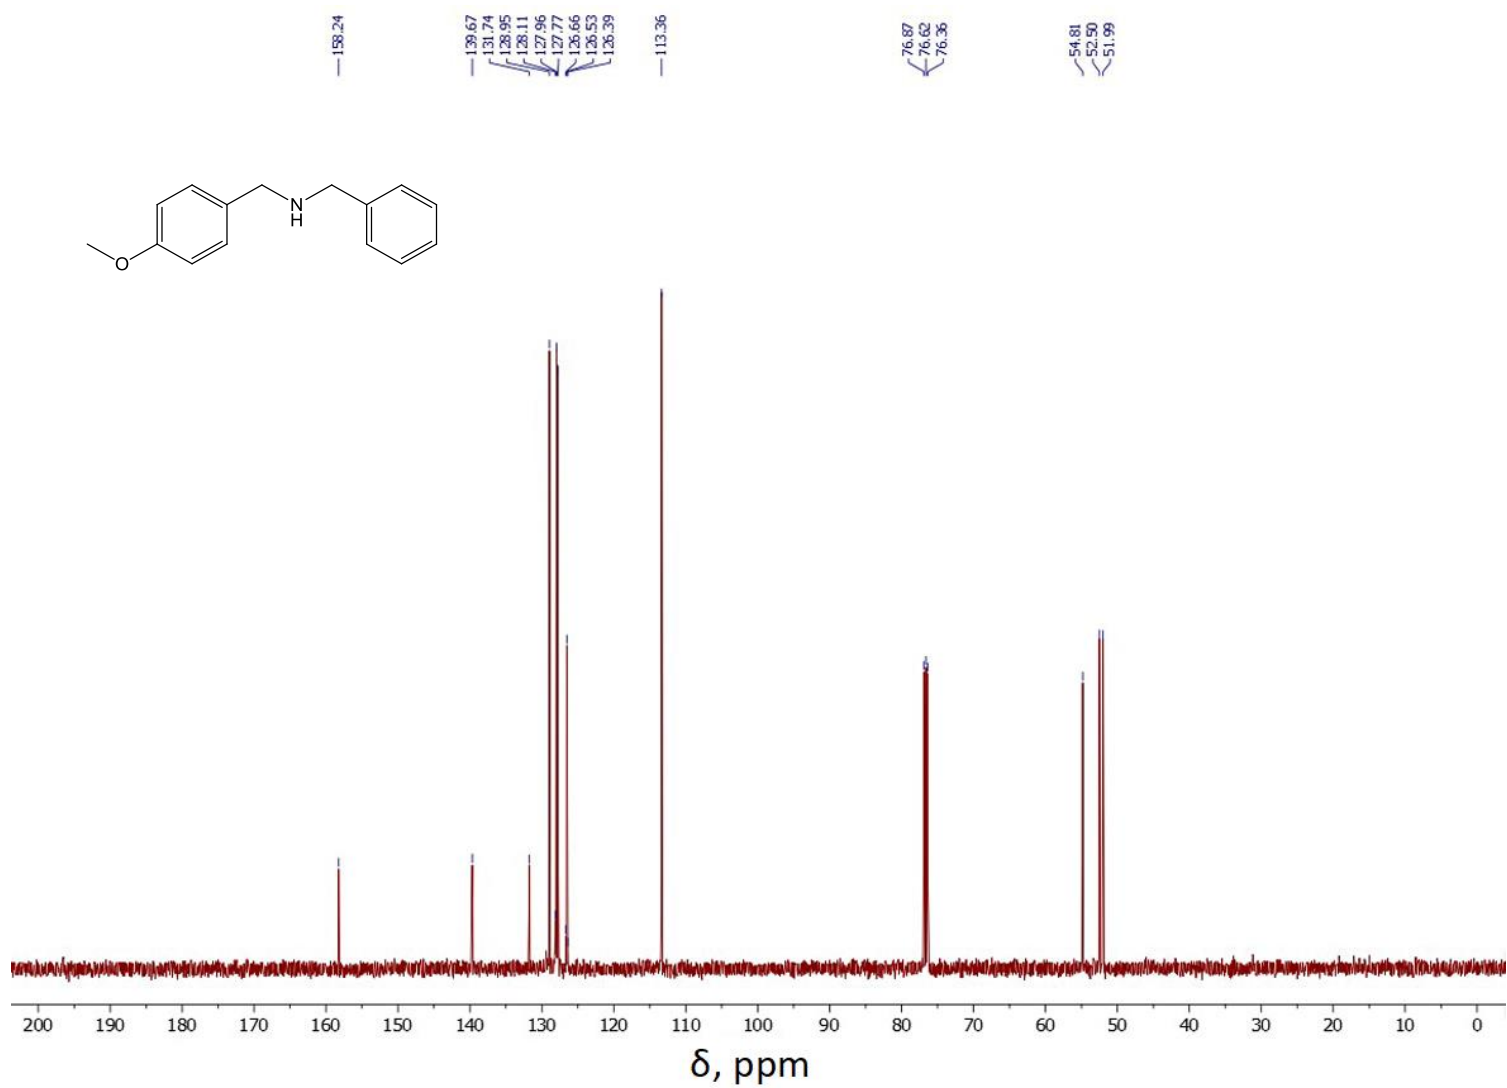

**Figure S4.** <sup>13</sup>C NMR of *N*-benzyl-*N*-*p*-methoxybenzylamine (126 MHz, CDCl<sub>3</sub>)

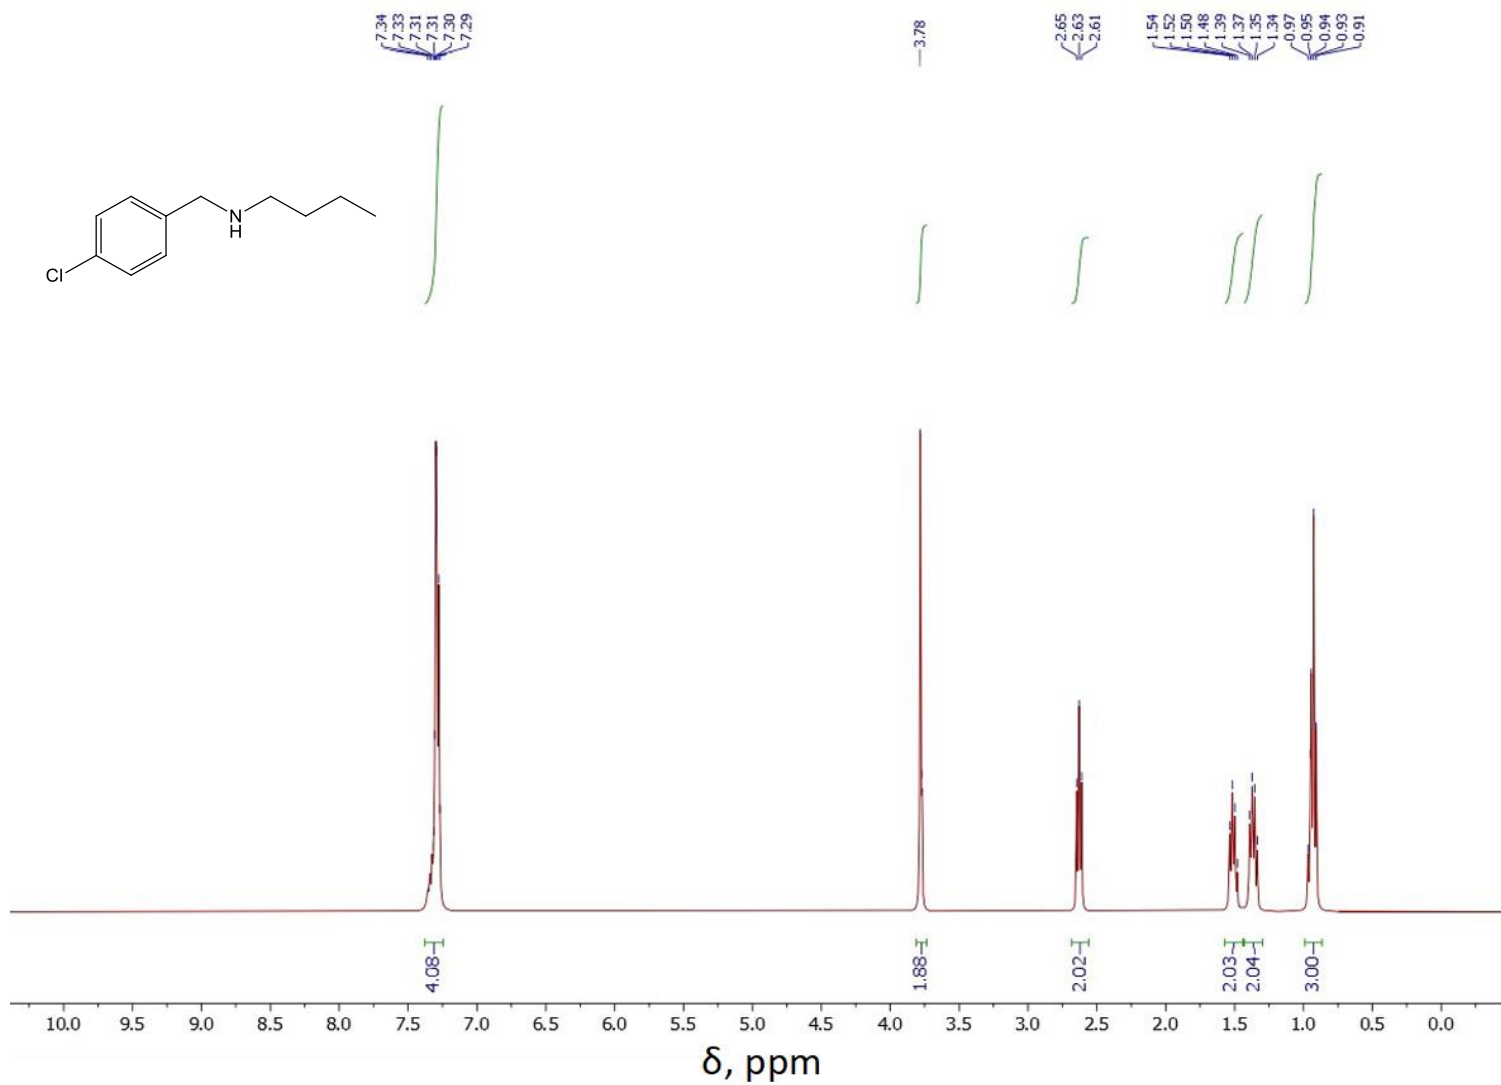

**Figure S5.** <sup>1</sup>H NMR of *N*-butyl-*N*-*p*-chlorobenzylamine (400 MHz, CDCl<sub>3</sub>)

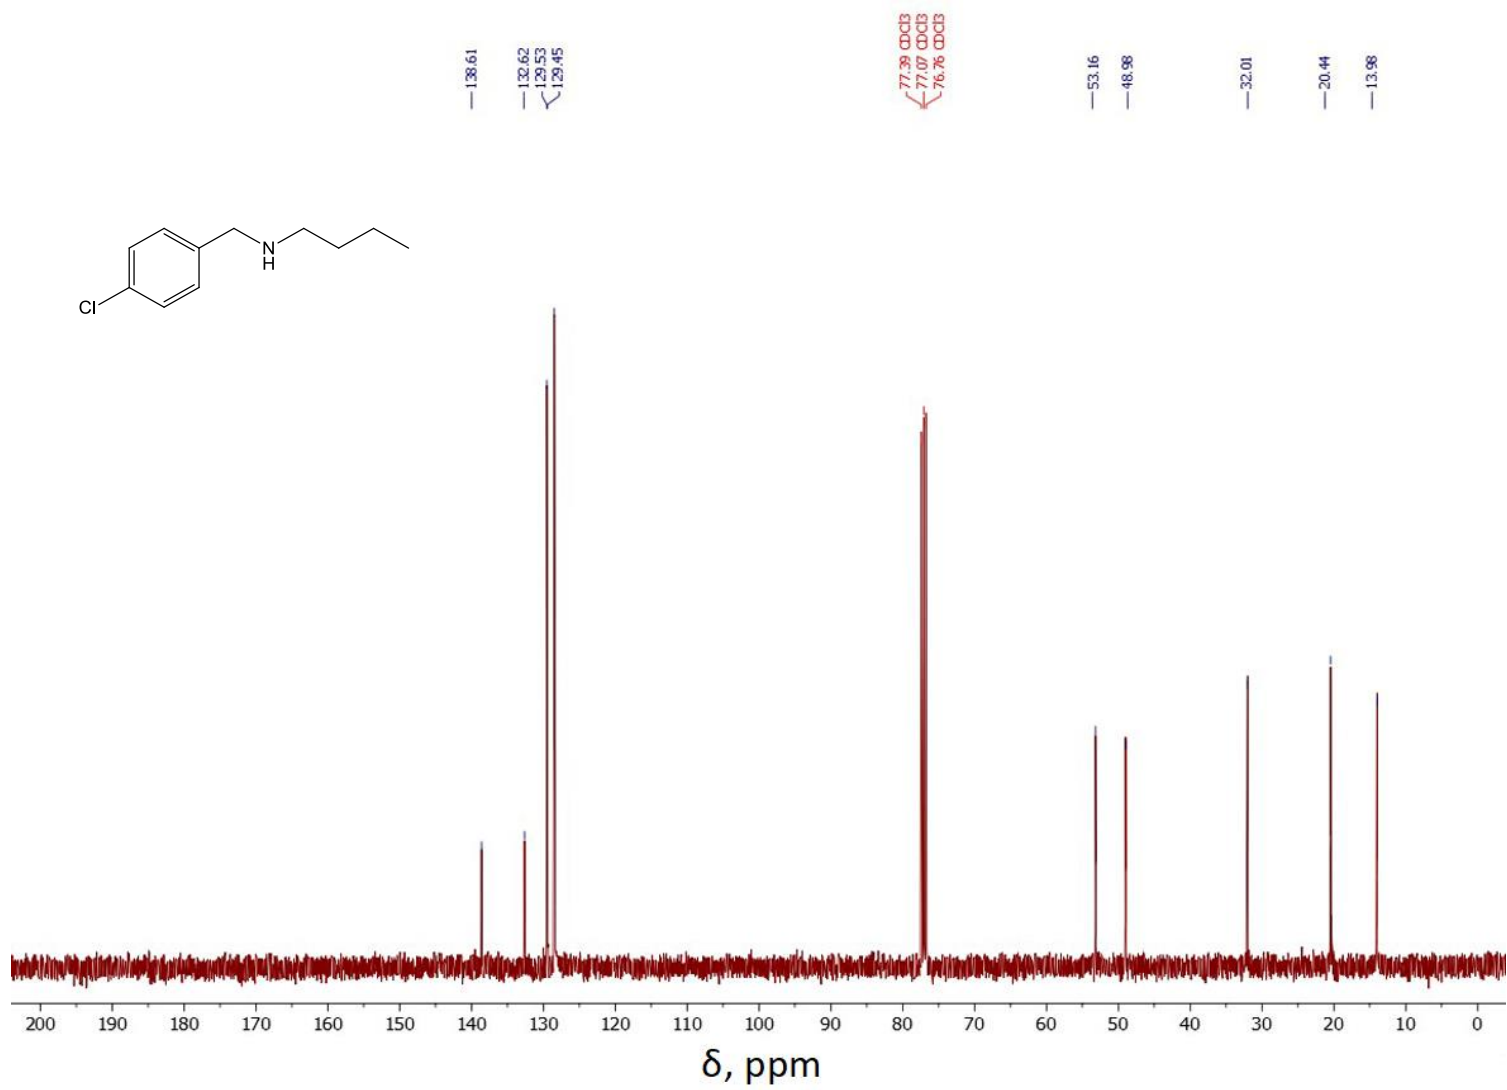

**Figure S6.** <sup>13</sup>C NMR of *N*-butyl-*N*-*p*-chlorobenzylamine (126 MHz, CDCl<sub>3</sub>)

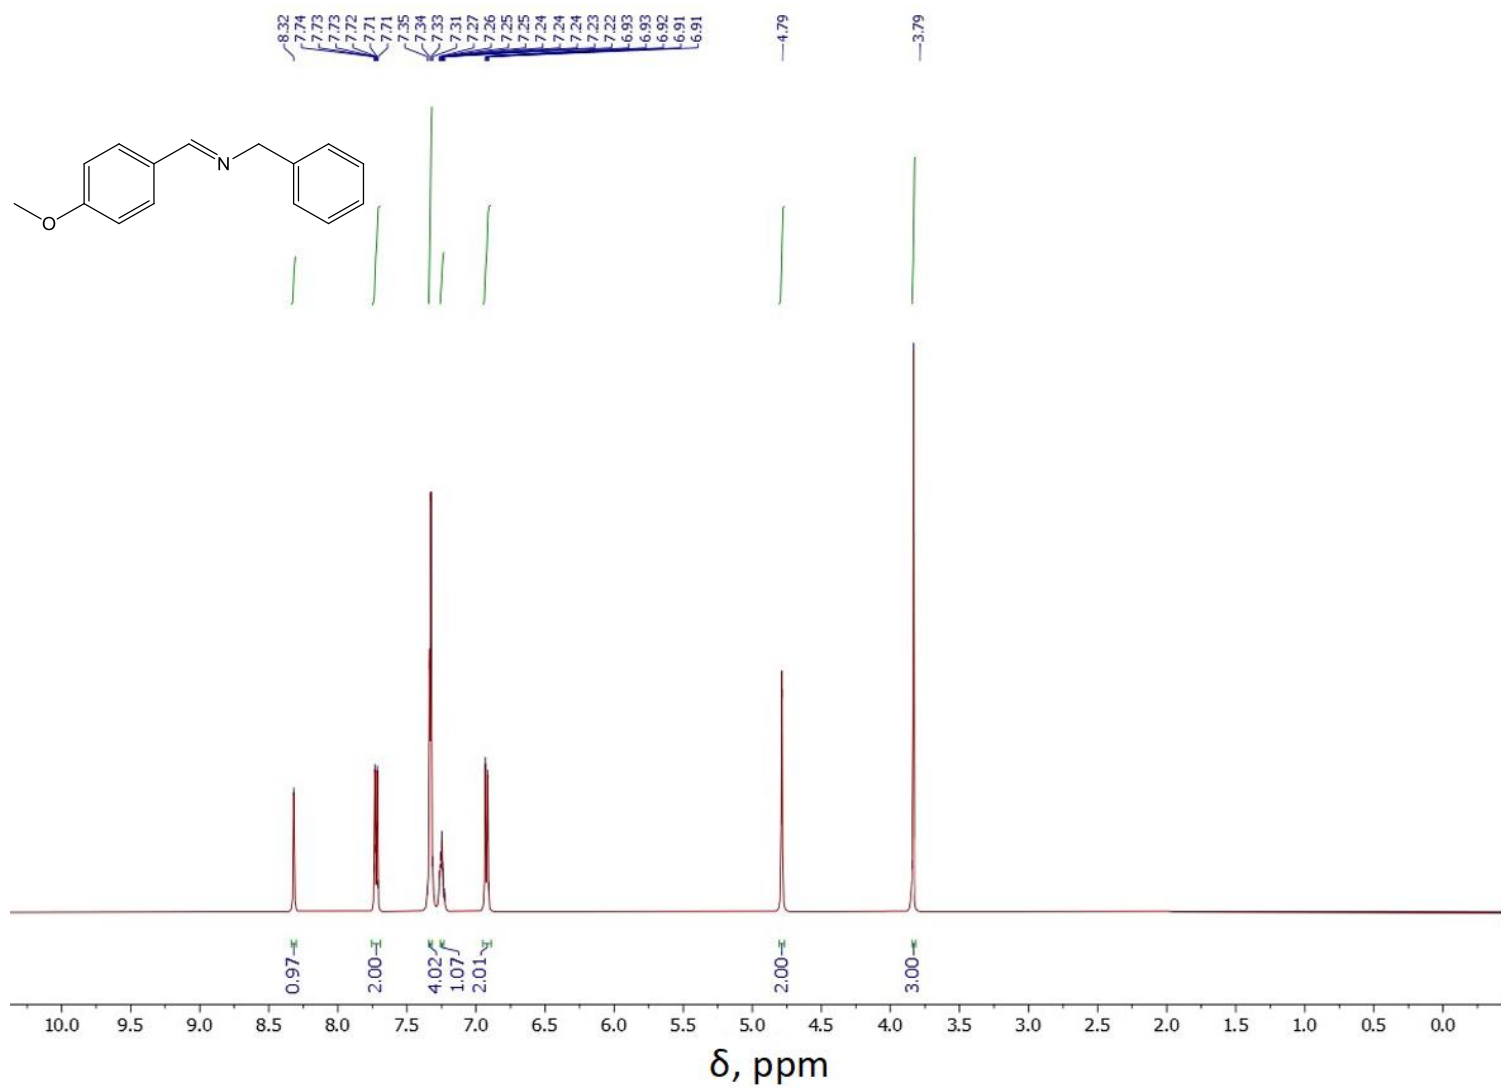

**Figure S7.** <sup>1</sup>H NMR of *N*-(4-methoxybenzyl)benzalimine (400 MHz, CDCl<sub>3</sub>)

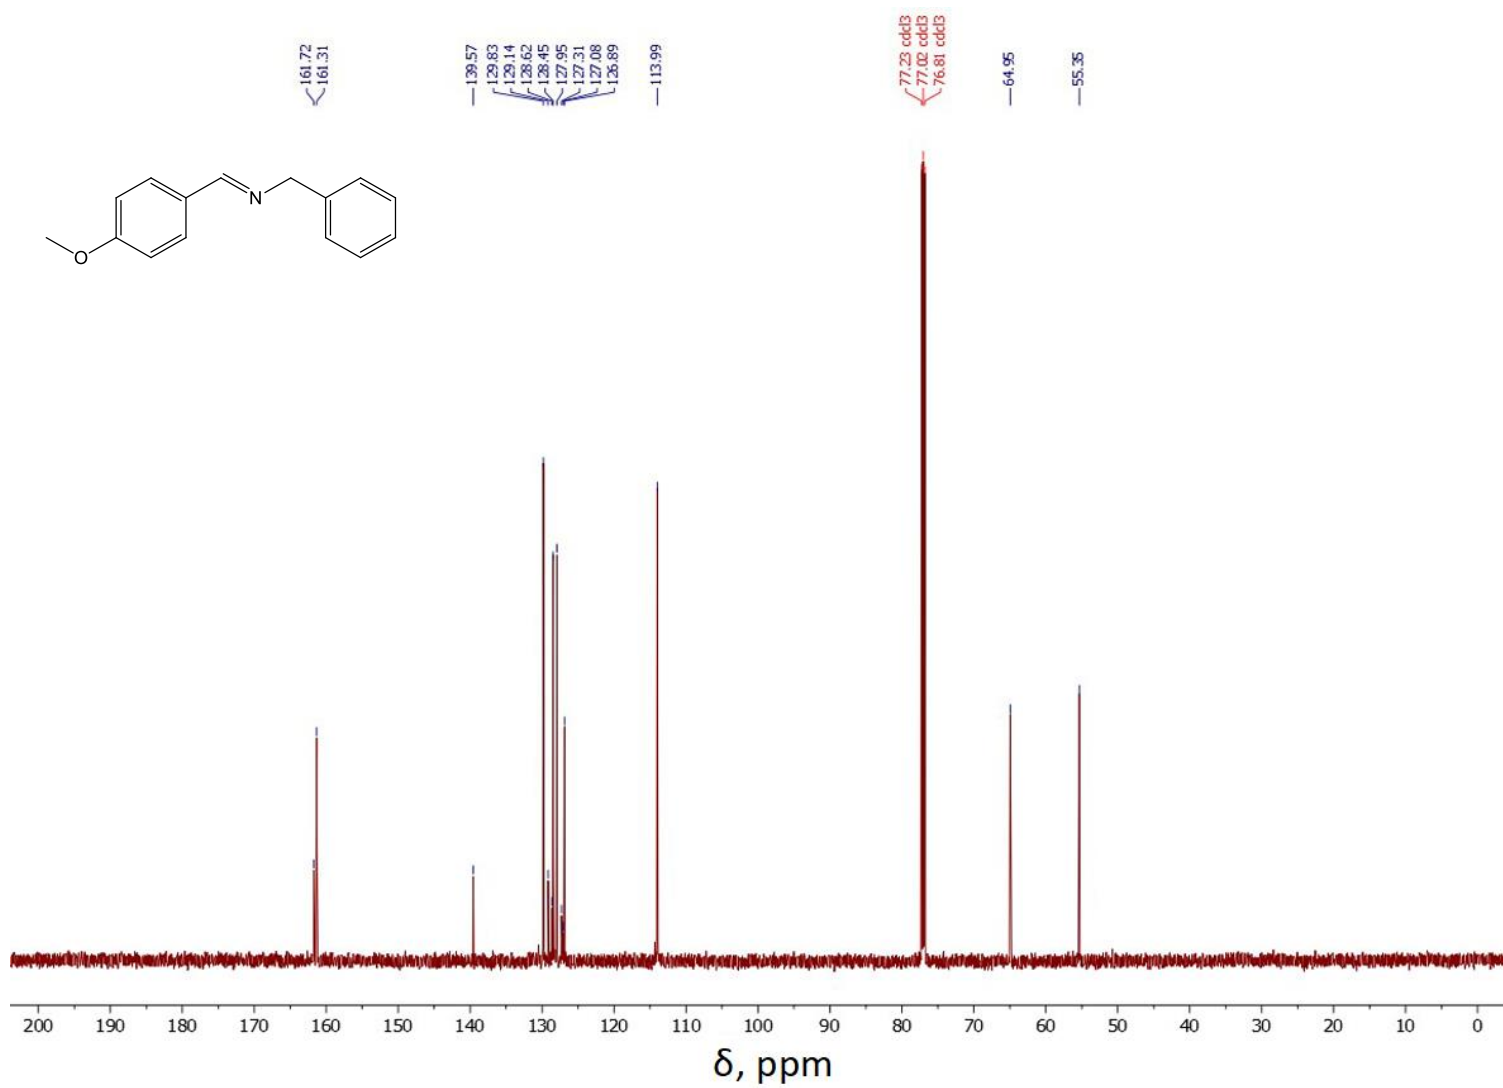

**Figure S8.** <sup>13</sup>C NMR of *N*-(4-methoxybenzyl)benzaldimine (126 MHz, CDCl<sub>3</sub>)
